# Supplementary material for: A soft microchannel decreases polydispersity of droplet generation
Source: Royal Society of Chemistry journal article supplement (doi:10.1039/c4lc00871e), 2014-01-01
Supplement: c4lc00871e1.pdf [file c4lc00871e1.pdf]

## Supplementary Material

Table A. Dimensions of the relevant geometrical parameters for the eight different T-junction microchannels. Given geometrical parameters are described in Fig. 2(b)-(c).

| Case | $w_m$ ( $\mu\text{m}$ ) | $w_s$ ( $\mu\text{m}$ ) | $h$ ( $\mu\text{m}$ ) | $t$ ( $\mu\text{m}$ ) |
|------|-------------------------|-------------------------|-----------------------|-----------------------|
| 1    | 100                     | 50                      | 45                    | 17 on glass slide     |
| 2    | 100                     | 50                      | 45                    | 17                    |
| 3    | 100                     | 50                      | 45                    | 10                    |
| 4    | 100                     | 50                      | 45                    | 5                     |
| 5    | 200                     | 100                     | 45                    | 17 on glass slide     |
| 6    | 200                     | 100                     | 45                    | 17                    |
| 7    | 200                     | 100                     | 45                    | 10                    |
| 8    | 200                     | 100                     | 45                    | 5                     |

Table B. Mechanical properties of thin membranes. The Young's modulus ( $E$ ) is measured by an Agilent Nano Indenter G200. The bending stiffness  $B$  is calculated according to the equation,  $B = EI$  where  $I$  is the second moment of area;  $I = t^3 w_m / 12$  for a thin film of thickness  $t$  and width  $w$ .

| Case | $w_m$ ( $\mu\text{m}$ ) | $t$ ( $\mu\text{m}$ ) | $E$ (Pa)              | $B$ ( $\text{Nm}^2$ )         |
|------|-------------------------|-----------------------|-----------------------|-------------------------------|
| 1    | 100                     | 17 on glass slide     | $7.17 \times 10^{10}$ | $4.8 \times 10^{-3} \ddagger$ |
| 2    | 100                     | 17                    | $6.00 \times 10^6$    | $2.5 \times 10^{-13}$         |
| 3    | 100                     | 10                    | $6.98 \times 10^6$    | $5.8 \times 10^{-14}$         |
| 4    | 100                     | 5                     | $7.17 \times 10^6$    | $7.5 \times 10^{-15}$         |
| 5    | 200                     | 17 on glass slide     | $7.17 \times 10^{10}$ | $9.6 \times 10^{-3} \ddagger$ |
| 6    | 200                     | 17                    | $6.0 \times 10^6$     | $4.9 \times 10^{-13}$         |
| 7    | 200                     | 10                    | $6.98 \times 10^6$    | $1.6 \times 10^{-13}$         |
| 8    | 200                     | 5                     | $7.17 \times 10^6$    | $1.5 \times 10^{-14}$         |

$\ddagger$  For cases 1 and 5, to calculate the bending stiffness, we assume that the dominant material is the glass slide where the thickness is 2 mm. Therefore, the Young's modulus of the glass slide is used for the two cases.

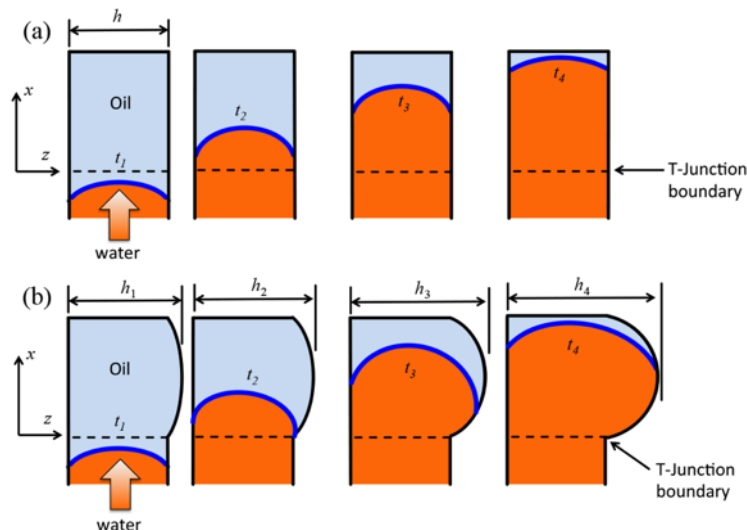

Fig. A. Comparison of schematics of the liquid-liquid interface time evolution in the  $x$ - $z$  plane at the T-junction. (a) The conventional rigid T-junction and (b) the soft wall T-junction. The blue solid lines indicate the water-oil interface.
